# Supplementary material
Source: ML conference proceedings conference paper supplement (https://proceedings.neurips.cc/paper_files/paper/2019/hash/8b6dd7db9af49e67306feb59a8bdc52c-Abstract.html)
Supplement: Supplementary file [file 8b6dd7db9af49e67306feb59a8bdc52c-Supplemental.zip]

---

# Strategizing against No-regret Learners

---

Anonymous Author(s)

Affiliation

Address

email

## Abstract

1 How should a player who repeatedly plays a game against a no-regret learner  
2 strategize to maximize his utility? We study this question and show that under  
3 some mild assumptions, the player can always guarantee himself a utility of at least  
4 what he would get in a Stackelberg equilibrium of the game. When the no-regret  
5 learner has only two actions, we show that the player cannot get any higher utility  
6 than the Stackelberg equilibrium utility. But when the no-regret learner has more  
7 than two actions and plays a mean-based no-regret strategy, we show that the  
8 player can get strictly higher than the Stackelberg equilibrium utility. We provide  
9 a characterization of the optimal game-play for the player against a mean-based  
10 no-regret learner as a solution to a control problem. When the no-regret learner's  
11 strategy also guarantees him a no-swap regret, we show that the player cannot get  
12 anything higher than a Stackelberg equilibrium utility.

## 1 Introduction

14 Consider a two player bimatrix game with a finite number of actions for each player repeated over  $T$   
15 rounds. When playing a repeated game, a widely adopted strategy is to employ a *no-regret learning*  
16 *algorithm*: a strategy that guarantees the player that in hindsight no single action when played  
17 throughout the game would have performed significantly better. Knowing that one of the players (the  
18 *learner*) is playing a no-regret learning strategy, what is the optimal gameplay for the other player  
19 (the *optimizer*)? This question is the focus of our work.

20 If this were a single-shot strategic game where learning is not relevant, a (pure or mixed strategy)  
21 Nash equilibrium is a reasonable prediction of the game's outcome. In the  $T$  rounds game with  
22 learning, can the optimizer guarantee himself a per-round utility of at least what he could get in a  
23 single-shot game? Is it possible to get significantly more utility than this? Does this utility depend on  
24 the specific choice of learning algorithm of the learner? What gameplay the optimizer should adopt  
25 to achieve maximal utility? None of these questions are straightforward, and indeed none of these  
26 have unconditional answers.

27 **Our results.** Central to our results is the idea of the Stackelberg equilibrium of the underlying  
28 game. The Stackelberg variant of our game is a single-shot two-stage game where the optimizer is  
29 the first player and can publicly commit to a mixed strategy; the learner then best responds to this  
30 strategy. The Stackelberg equilibrium is the resulting equilibrium of this game when both players  
31 play optimally. Note that the optimizer's utility in the Stackelberg equilibrium is always weakly  
32 larger than his utility in any (pure or mixed strategy) Nash equilibrium, and is often strictly larger.

33 Let  $V$  be the utility of the optimizer in the Stackelberg equilibrium. With some mild assumptions on  
34 the game, we show that the optimizer can always guarantee himself a utility of at least  $(V - \epsilon)T - o(T)$   
35 in  $T$  rounds, irrespective of the learning algorithm used by the learner as long as it has the no-regret  
36 guarantee (see Theorem 4). This means that if one of the players is a learner the other player can

37 already profit over the Nash equilibrium regardless of the specifics of the learning algorithm employed  
38 or the structure of the game. Further, if any one of the following conditions is true:

- 39 1. the game is a constant-sum game,
- 40 2. the optimizer’s no-regret algorithm has the stronger guarantee of no-swap regret (see Section 2),
- 41 3. the learner has only two possible actions in the game,

42 the learner cannot get a utility higher than  $VT + o(T)$  (see Theorem 5, Theorem 6, Theorem 7).

43 If the learner employs a learning algorithm from a natural class of algorithms called mean-based  
44 learning algorithms [Braverman et al., 2018] (see Section 2) that includes popular no-regret algorithms  
45 like the Multiplicative Weights algorithm, Follow-the-Perturbed-Leader algorithm, we show that  
46 there exist games where the optimizer can guarantee himself a utility  $V'T - o(T)$  for some  $V' > V$   
47 (see Theorem 8). We note the contrast between the cases of 2 and 3 actions for the learner: in the  
48 2-actions case even if the learner plays a mean-based strategy, the optimizer cannot get anything more  
49 than  $VT + o(T)$  (Theorem 7), whereas with 3 actions, there are games where he is able to guarantee  
50 a linearly higher utility.

51 Given this possibility of exceeding Stackelberg utility, our final result is on the nature and structure  
52 of the *utility optimal gameplay* for the optimizer against a learner that employs a mean-based strategy.  
53 First, we give a crisp characterization of the optimizer’s asymptotic optimal algorithm as the solution  
54 to a control problem (see Section 4.2) in  $N$  dimensions where  $N$  is the number of actions for the  
55 learner. This characterization is predicated on the fact that just knowing the cumulative historical  
56 utilities of each of the learner’s actions is essentially enough information to accurately predict the  
57 learner’s next action in the case of a mean-based learner. These  $N$  cumulative utilities thus form an  
58  $N$ -dimensional “state” for the learner which the optimizer can manipulate via their choice of action.  
59 We then proceed to make multiple observations that simplify the solution space for this control  
60 problem. We leave as a very interesting open question of computing or characterizing the optimal  
61 solution to this control problem; we provide one conjecture of a potential characterization.

62 **Comparison to prior work.** The very recent work of Braverman et al. [2018] is the closest to ours.  
63 They study the specific 2-player game of an auction between a single seller and single buyer. The  
64 main difference from Braverman et al. [2018] is that they consider a Bayesian setting where the  
65 buyer’s type is drawn from a distribution, whereas there is no Bayesian element in our setting. But  
66 beyond that the seller’s choice of the auction represents his action, and the buyer’s bid represents  
67 her action. They show that regardless of the specific algorithm used by the buyer, as long as the  
68 buyer plays a no-regret learning algorithm the seller can always earn at least the optimal revenue  
69 in a single shot auction. Our Theorem 4 is a direct generalization of this result to arbitrary games  
70 without any structure. Further Braverman et al. show that there exist no-regret strategies for the buyer  
71 that guarantee that the seller cannot get anything better than the single-shot optimal revenue. Our  
72 Theorems 5, 6 and 7 are both a generalization and refinement of this result, as they pinpoint both  
73 the exact learner strategies and the kind of games that prevent the optimizer from going beyond the  
74 Stackelberg utility. Braverman et al. show that when the buyer plays a mean-based strategy, the seller  
75 can design an auction to guarantee him a revenue beyond the per round auction revenue. Our control  
76 problem can be seen as a rough parallel and generalization of this result.

77 **Other related work.** The first notion of regret (without the swap qualification) we use in the paper  
78 is also referred to as external-regret (see Hannan [1957], Foster and Vohra [1993], Littlestone and  
79 Warmuth [1994], Freund and Schapire [1997], Freund and Schapire [1999], Cesa-Bianchi et al.  
80 [1997]). The other notion of regret we use is swap regret. There is a slightly weaker notion of regret  
81 called internal regret that was defined earlier in Foster and Vohra [1998], which allows all occurrences  
82 of a given action  $x$  to be replaced by another action  $y$ . Many no-internal-regret algorithms have been  
83 designed (see for example Hart and Mas-Colell [2000], Foster and Vohra [1997, 1998, 1999], Cesa-  
84 Bianchi and Lugosi [2003]). The stronger notion of swap regret was introduced in Blum and Mansour  
85 [2005], and it allows one to simultaneously swap several pairs of actions. Blum and Mansour show  
86 how to efficiently convert a no-regret algorithm to a no-swap-regret algorithm. One of the reasons  
87 behind the importance of internal and swap regret is their close connection to the central notion of  
88 correlated equilibrium introduced by Aumann [1974]. In a general  $n$  players game, a distribution over  
89 action profiles of all the players is a correlated equilibrium if every player has zero internal regret.  
90 When all players use algorithms with no-internal-regret guarantees, the time averaged strategies of  
91 the players converges to a correlated equilibrium (see Hart and Mas-Colell [2000]). When all players

simply use algorithms with no-external-regret guarantees, the time averaged strategies of the players converges to the weaker notion of coarse correlated equilibrium. When the game is a zero-sum game, the time-averaged strategies of players employing no-external-regret dynamics converges to the Nash equilibrium of the game.

On the topic of optimizing against a no-regret-learner, Agrawal et al. [2018] study a setting similar to Braverman et al. [2018] but also consider other types of buyer behavior apart from learning, and show to how to robustly optimize against various buyer strategies in an auction.

## 2 Model and Preliminaries

### 2.1 Games and equilibria

Throughout this paper, we restrict our attention to simultaneous two-player bimatrix games  $G$ . We refer to the first player as the *optimizer* and the second player as the *learner*. We denote the set of actions available to the optimizer as  $\mathcal{A} = \{a_1, a_2, \dots, a_M\}$  and the set of actions available to the learner as  $\mathcal{B} = \{b_1, b_2, \dots, b_N\}$ . If the optimizer chooses action  $a_i$  and the learner chooses action  $b_j$ , then the optimizer receives utility  $u_A(a_i, b_j)$  and the learner receives utility  $u_L(a_i, b_j)$ . We normalize the utility such that  $|u_A(a_i, b_j)| \leq 1$  and  $|u_L(a_i, b_j)| \leq 1$ . We write  $\Delta(\mathcal{A})$  and  $\Delta(\mathcal{B})$  to denote the set of mixed strategies for the optimizer and learner respectively. When the optimizer plays  $\alpha \in \Delta(\mathcal{A})$  and the learner plays  $\beta \in \Delta(\mathcal{B})$ , the optimizer's utility is denoted by  $u_A(\alpha, \beta) = \sum_{i=1}^M \sum_{j=1}^N \alpha_i \beta_j u_A(a_i, b_j)$ , similarly for the learner's utility.

We say that a strategy  $b \in \mathcal{B}$  is a best-response to a strategy  $\alpha \in \Delta(\mathcal{A})$  if  $b \in \operatorname{argmax}_b u_L(\alpha, b)$ . We are now ready to define Stackelberg equilibrium [Von Stackelberg, 2010].

**Definition 1.** *The Stackelberg equilibrium of a game is a pair of mixed strategies  $(\alpha, \beta)$  that maximizes  $u_A(\alpha, \beta)$  under the constraint that  $\beta$  is a best-response to  $\alpha$ . We call the value  $u_A(\alpha, \beta)$  the Stackelberg value of the game.*

A game is *zero-sum* if  $u_A(a_i, b_j) + u_L(a_i, b_j) = 0$  for all  $i \in [M]$  and  $j \in [N]$ ; likewise, a game is *constant-sum* if  $u_A(a_i, b_j) + u_L(a_i, b_j) = C$  for some fixed constant  $C$  for all  $i \in [M]$  and  $j \in [N]$ . Note that for zero-sum or constant-sum games, the Stackelberg equilibrium coincides with the standard notion of Nash equilibrium due to the celebrated minimax theorem [von Neumann, 1928]. Moreover, throughout this paper, we assume that the learner does not have weakly dominated strategies: a strategy  $b \in \mathcal{B}$  is weakly dominated if there exists  $\beta \in \Delta(\mathcal{B} \setminus \{b\})$  such that for all  $a \in \mathcal{A}$ ,  $u_L(a, \beta) \geq u_L(a, b)$ .

We are interested in the setting where the optimizer and the learner repeatedly play the game  $G$  for  $T$  rounds. We will denote the optimizer's action at time  $t$  as  $a^t$ ; likewise we will denote the learner's action at time  $t$  as  $b^t$ . Both the optimizer and learner's utilities are additive over rounds with no discounting.

The optimizer's strategy can be adaptive (i.e.  $a^t$  can depend on the previous values of  $b^t$ ) or non-adaptive (in which case it can be expressed as a sequence of mixed strategies  $(\alpha^1, \alpha^2, \dots, \alpha^T)$ ). Unless otherwise specified, all positive results (results guaranteeing the optimizer can guarantee some utility) apply for non-adaptive optimizers and all negative results apply even to adaptive optimizers. As the name suggests, the learner's (adaptive) strategy will be specified by some variant of a low-regret learning algorithm, as described in the next section.

### 2.2 No-regret learning and mean-based learning

In the classic multi-armed bandit problem with  $T$  rounds, the learner selects one of  $K$  options (a.k.a. arms) on round  $t$  and receives a reward  $r_{i,t} \in [0, 1]$  if he selects option  $i$ . The rewards can be chosen adversarially and the learner's objective is to maximize her total reward.

Let  $i_t$  be the arm pulled by the learner at round  $t$ . The *regret* for a (possibly randomized) learning algorithm  $\mathcal{A}$  is defined as the difference between performance of the algorithm  $\mathcal{A}$  and the best arm:  $\operatorname{Reg}(\mathcal{A}) = \max_i \sum_{t=1}^T r_{i,t} - r_{i_t,t}$ . An algorithm  $\mathcal{A}$  for the multi-armed bandit problem is *no-regret* if the expected regret is sub-linear in  $T$ , i.e.,  $\mathbb{E}[\operatorname{Reg}(\mathcal{A})] = o(T)$ . In addition to the *bandits* setting in which the learner only learns the reward of the arm he pulls, our results also apply to the *experts*

141 setting in which the learner can learn the rewards of all arms for every round. Simple no-regret  
142 strategies exist in both the bandits and the experts settings.

143 Among no-regret algorithms, we are interested in two special classes of algorithms. The first is the  
144 class of *mean-based* strategies:

145 **Definition 2** (Mean-based Algorithm). *Let  $\sigma_{i,t} = \sum_{s=1}^t r_{i,s}$  be the cumulative reward for pulling*  
146 *arm  $i$  for the first  $t$  rounds. An algorithm is  $\gamma$ -mean-based if whenever  $\sigma_{i,t} < \sigma_{j,t} - \gamma T$ , the*  
147 *probability for the algorithm to pull arm  $i$  on round  $t$  is at most  $\gamma$ . An algorithm is mean-based if it is*  
148  *$\gamma$ -mean-based for some  $\gamma = o(1)$ .*

149 Intuitively, mean-based strategies are strategies that play the arm that historically performs the best.  
150 Braverman et al. [2018] shows that many no-regret algorithms are mean-based, including commonly  
151 used variants of EXP3 (for the bandits setting), the Multiplicative Weights algorithm (for the experts  
152 setting) and the Follow-the-Perturbed-Leader algorithm (for the experts setting).

153 The second class is the class of *no-swap-regret* algorithms:

154 **Definition 3** (No-Swap-Regret Algorithm). *The swap regret  $\text{Reg}_{\text{swap}}(\mathcal{A})$  of an algorithm  $\mathcal{A}$  is*  
155 *defined as*

$$\text{Reg}_{\text{swap}}(\mathcal{A}) = \max_{\pi: [K] \rightarrow [K]} \text{Reg}(\mathcal{A}, \pi) = \sum_{t=1}^T r_{\pi(i_t),t} - r_{i_t,t}$$

156 *where the maximum is over all functions  $\pi$  mapping actions to actions. An algorithm is no-swap-regret*  
157 *if the expected swap regret is sublinear in  $T$ , i.e.  $\mathbb{E}[\text{Reg}_{\text{swap}}(\mathcal{A})] = o(T)$ .*

158 Intuitively, no-swap-regret strategies strengthen the no-regret criterion in the following way: no-regret  
159 guarantees the learning algorithm performs as well as the best possible arm overall, but no-swap-  
160 regret guarantees the learning algorithm performs as well as the best possible arm over each subset of  
161 rounds where the same action is played. Given a no-regret algorithm, a no-swap-regret algorithm can  
162 be constructed via a clever reduction (see Blum and Mansour [2005]).

### 163 3 Playing against no-regret learners

#### 164 3.1 Achieving Stackelberg equilibrium utility

165 To begin with, we show that the optimizer can achieve an average utility per round arbitrarily close to  
166 the Stackelberg value against a no-regret learner.

167 **Theorem 4.** *Let  $V$  be the Stackelberg value of the game  $G$ . If the learner is playing a no-regret*  
168 *learning algorithm, then for any  $\varepsilon > 0$ , the optimizer can guarantee at least  $(V - \varepsilon)T - o(T)$  utility.*

169 *Proof.* Let  $(\alpha, b)$  be the Stackelberg equilibrium of the game  $G$ . Since  $(\alpha, b)$  forms a Stackelberg  
170 equilibrium,  $b \in \arg\max_{b'} u_L(\alpha, b')$ . Moreover, by the assumption that the learner does not have a  
171 weakly dominated strategy, there does not exist  $\beta \in \Delta(\mathcal{B} \setminus \{b\})$  such that for all  $a \in \mathcal{A}$ ,  $u_L(a, \beta) \geq$   
172  $u_L(a, b)$ . By Farkas's lemma [Farkas, 1902], there must exist an  $\alpha' \in \Delta(\mathcal{A})$  such that for all  
173  $b' \in \mathcal{B} \setminus \{b\}$ ,  $u_L(\alpha', b) \geq u_L(\alpha', b') + \kappa$  for  $\kappa > 0$ .

174 Therefore, for any  $\delta \in (0, 1)$ , the optimizer can play the strategy  $\alpha^* = (1 - \delta)\alpha + \delta\alpha'$  such that  $b$   
175 is the unique best response to  $\alpha^*$  and playing strategy  $b' \neq b$  will induce a utility loss at least  $\kappa$  for  
176 the learner. As a result, since the learner is playing a no-regret learning algorithm, in expectation,  
177 there is at most  $o(T)$  rounds in which the learner plays  $b' \neq b$ . It follows that the optimizer's  
178 utility is at least  $VT - \delta(V - u_L(\alpha', b))T - o(T)$ . Thus, we can conclude our proof by setting  
179  $\varepsilon = \delta(V - u_L(\alpha', b))$ .  $\square$

180 Next, we show that in the special class of constant-sum games, the Stackelberg value is the best that  
181 the optimizer can hope for when playing against a no-regret learner.

182 **Theorem 5.** *Let  $G$  be a constant-sum game, and let  $V$  be the Stackelberg value of this game. If the*  
183 *learner is playing a no-regret algorithm, then the optimizer receives no more than  $VT + o(T)$  utility.*

184 *Proof.* Let  $\vec{a} = (a^1, \dots, a^T)$  be the sequence of the optimizer's actions. Moreover, let  $\alpha^* \in \Delta(\mathcal{A})$   
185 be a mixed strategy such that  $\alpha^*$  plays  $a_i \in \mathcal{A}$  with probability  $\alpha_i^* = |\{t \mid a^t = a_i\}|/T$ .

186 Since the learner is playing a no-regret learning algorithm, the learner's cumulative utility is at least  
 187  $\max_{b' \in \mathcal{B}} u_L(a^*, b')T - o(T) = -(\min_{b' \in \mathcal{B}} u_A(a^*, b')T + o(T))$ , which implies that the optimizer's  
 188 utility is at most

$$\max_{a^* \in \Delta(\mathcal{A})} \min_{b' \in \mathcal{B}} u_A(a^*, b')T + o(T) = VT + o(T)$$

189 where the equality follows since in a constant-sum game, the Stackelberg value is equal to the  
 190 minimax value by the minimax theorem.  $\square$

### 191 3.2 No-swap-regret learning

192 In this section, we show that if the learner is playing a no-swap-regret algorithm, the optimizer can  
 193 only achieve their Stackelberg utility per round.

194 **Theorem 6.** *Let  $V$  be the Stackelberg value of the game  $G$ . If the learner is playing a no-swap-regret  
 195 algorithm, then the optimizer will receive no more than  $VT + o(T)$  utility.*

196 *Proof.* Let  $\vec{a} = (a^1, \dots, a^T)$  be the sequence of the optimizer's actions and let  $\vec{b} = (b^1, \dots, b^T)$  be  
 197 the realization of the sequence of the learner's actions. Moreover, let  $\Pr[\vec{b}]$  be the probability that  
 198 the learner (who is playing some no-swap-regret learning algorithm) plays  $\vec{b}$  given that the adversary  
 199 plays  $\vec{a}$ . Then, the marginal probability for the learner to play  $b_j \in \mathcal{B}$  at round  $t$  is

$$\Pr[b^t = b_j] = \sum_{\vec{b}: b^t = b_j} \Pr[\vec{b}].$$

200 Let  $\alpha^{b_j} \in \Delta(\mathcal{A})$  be a mixed strategy such that  $\alpha^{b_j}$  plays  $a_i \in \mathcal{A}$  with probability

$$\alpha_i^{b_j} = \frac{\sum_{t: a^t = a_i} \Pr[b^t = b_j]}{\sum_t \Pr[b^t = b_j]}.$$

201 Let  $\bar{\mathcal{B}} = \{b \in \mathcal{B} : b_j \notin \arg\max_{b'} u_L(\alpha^{b_j}, b')\}$  and consider a mapping  $\pi$  such that  $\pi(b_j) \in$   
 202  $\arg\max_{b'} u_L(\alpha^{b_j}, b')$ . Then, the swap-regret under  $\pi$  is

$$\begin{aligned} & \sum_{b_j \in \mathcal{B}} \left( (u_L(\alpha^{b_j}, \pi(b_j)) - u_L(\alpha^{b_j}, b_j)) \cdot \sum_t \Pr[b^t = b_j] \right) \\ &= \sum_{b_j \in \bar{\mathcal{B}}} \left( (u_L(\alpha^{b_j}, \pi(b_j)) - u_L(\alpha^{b_j}, b_j)) \cdot \sum_t \Pr[b^t = b_j] \right) \\ &\geq \delta \cdot \sum_{b_j \in \bar{\mathcal{B}}} \left( \sum_t \Pr[b^t = b_j] \right) \end{aligned}$$

203 where  $\delta = \min_{b_j \in \bar{\mathcal{B}}} (u_L(\alpha^{b_j}, \pi(b_j)) - u_L(\alpha^{b_j}, b_j))$ . Therefore, since the learner is playing a no-  
 204 swap-regret algorithm, we have  $\sum_{b_j \in \bar{\mathcal{B}}} (\sum_t \Pr[b^t = b_j]) = o(T)$ .

205 Moreover, for  $b_j \in \mathcal{B} \setminus \bar{\mathcal{B}}$ , the optimizer's utility when the learner plays  $b_j$  is at most

$$u_A(\alpha^{b_j}, b_j) \cdot \sum_t \Pr[b^t = b_j] \leq V \cdot \sum_t \Pr[b^t = b_j].$$

206 Thus, the optimizer's utility is at most

$$\begin{aligned} & \sum_{b_j \in \mathcal{B}} \left( u_A(\alpha^{b_j}, b_j) \cdot \sum_t \Pr[b^t = b_j] \right) \\ &= \sum_{b_j \in \mathcal{B} \setminus \bar{\mathcal{B}}} \left( u_A(\alpha^{b_j}, b_j) \cdot \sum_t \Pr[b^t = b_j] \right) + \sum_{b_j \in \bar{\mathcal{B}}} \left( u_A(\alpha^{b_j}, b_j) \cdot \sum_t \Pr[b^t = b_j] \right) \\ &\leq V \cdot \sum_{b_j \in \mathcal{B} \setminus \bar{\mathcal{B}}} \left( \sum_t \Pr[b^t = b_j] \right) + 1 \cdot \sum_{b_j \in \bar{\mathcal{B}}} \left( \sum_t \Pr[b^t = b_j] \right) \\ &\leq VT + o(T). \end{aligned}$$

207

□

208 **Theorem 7.** *Let  $G$  be a game where the learner has  $N = 2$  actions, and let  $V$  be the Stackelberg*  
 209 *value of this game. If the learner is playing a no-regret algorithm, then the optimizer receives no*  
 210 *more than  $VT + o(T)$  utility.*

211 *Proof.* By Theorem 6, it suffices to show that when there are two actions for the learner, a no-regret  
 212 learning algorithm is in fact a no-swap-regret learning algorithm.

213 When there are only two actions, there are three possible mappings from  $\mathcal{B} \rightarrow \mathcal{B}$  other than the  
 214 identity mapping. Let  $\pi^1$  be a mapping such that  $\pi^1(b_1) = b_1$  and  $\pi^1(b_2) = b_1$ ,  $\pi^2$  be a mapping such  
 215 that  $\pi^2(b_1) = b_2$  and  $\pi^2(b_2) = b_2$ , and  $\pi^3$  be a mapping such that  $\pi^3(b_1) = b_2$  and  $\pi^3(b_2) = b_1$ .

216 Since the learner is playing a no-regret learning algorithm, we have  $\mathbb{E}[\text{Reg}(\mathcal{A}, \pi^1)] = o(T)$  and  
 217  $\mathbb{E}[\text{Reg}(\mathcal{A}, \pi^2)] = o(T)$ . Moreover, notice that  $\mathbb{E}[\text{Reg}(\mathcal{A}, \pi^3)] = \mathbb{E}[\text{Reg}(\mathcal{A}, \pi^1)] + \mathbb{E}[\text{Reg}(\mathcal{A}, \pi^2)] =$   
 218  $o(T)$ , which concludes the proof. □

## 219 4 Playing against mean-based learners

220 From the results of the previous section, it is natural to conjecture that no optimizer can achieve more  
 221 than the Stackelberg value per round if playing against a no-regret algorithm. After all, this is true for  
 222 the subclass of no-swap-regret algorithms (Theorem 6) and is true for simple games: constant-sum  
 223 games (Theorems 5) and games in which the learner only has two actions (Theorem 7).

224 In this section we show that this is *not* the case. Specifically, we show that there exist games  $G$  where  
 225 an optimizer can win strictly more than the Stackelberg value every round when playing against a  
 226 mean-based learner. We emphasize that the same strategy for the optimizer will work against *any*  
 227 mean-based learning algorithm the learner uses.

228 We then proceed to characterize the optimal strategy for a non-adaptive optimizer playing against  
 229 a mean-based learner as the solution to an optimal control problem in  $N$  dimensions (where  $N$  is  
 230 the number of actions of the learner), and make several preliminary observations about structure an  
 231 optimal solution to this control problem must possess. Understanding how to efficiently solve this  
 232 control problem (or whether the optimal solution is even computable) is an intriguing open question.

### 233 4.1 Beating the Stackelberg value

234 We begin by showing it is possible for the optimizer to get significantly (linear in  $T$ ) more utility  
 235 when playing against a mean-based learner.

236 **Theorem 8.** *There exists a game  $G$  with Stackelberg value  $V$  where the optimizer can receive utility*  
 237 *at least  $V'T - o(T)$  against a mean-based learner for some  $V' > V$ .*

238 *Proof.* Assume that the learner is using a  $\gamma$ -mean-based algorithm. Consider the bimatrix game  
 239 shown in Table 1 in which the optimizer is the row player (These utilities are bounded in  $[-2, 2]$   
 240 instead of  $[-1, 1]$  for convenience; we can divide through by 2 to get a similar example where utility  
 241 is bounded in  $[-1, 1]$ ). We first argue that the Stackelberg value of this game is 0. Notice that if the  
 242 optimizer plays Bottom with probability more than 0.5, then the learner's best response is to play Mid,  
 243 resulting in a  $-2$  utility for the optimizer. However, if the optimizer plays Bottom with probability  
 244 at most 0.5, the expected utility for the optimizer from each column is at most 0. Therefore, in the  
 245 Stackelberg equilibrium, the optimizer will play Top and Bottom with probability 0.5 each, and the  
 246 learner will best respond with purely playing Right.

|        | Left                 | Mid        | Right     |
|--------|----------------------|------------|-----------|
| Top    | $(0, \sqrt{\gamma})$ | $(-2, -1)$ | $(-2, 0)$ |
| Bottom | $(0, -1)$            | $(-2, 1)$  | $(2, 0)$  |

Table 1: Example game for beating the Stackelberg value.

247 However, the optimizer can obtain utility  $T - o(T)$  by playing Top for the first  $\frac{1}{2}T$  rounds and  
 248 then playing Bottom for the remaining  $\frac{1}{2}T$  rounds. Given the optimizer's strategy, for the first  $\frac{1}{2}T$

rounds, the learner will play Left with probability at least  $(1 - 2\gamma)$  after first  $\sqrt{\gamma}T$  rounds. For the remaining  $\frac{1}{2}T$  rounds, the learner will switch to play Right with probability at least  $(1 - 2\gamma)$  between  $(\frac{1+\sqrt{\gamma}}{2} + \gamma)T$ -th round and  $(1 - \gamma)T$ -th round, since the cumulative utility for playing Left is at most  $\frac{1}{2}T \cdot \sqrt{\gamma} - \frac{\sqrt{\gamma}}{2}T - \gamma T = -\gamma T$  and the cumulative utility for playing Mid is at most  $-\gamma T$ .

Therefore, the cumulative utility for the optimizer for the first  $\frac{1}{2}T$  rounds is at least

$$(1 - 2\gamma)(\frac{1}{2} - \sqrt{\gamma})T \cdot 0 + \left(\frac{1}{2}T - (1 - 2\gamma)(\frac{1}{2} - \sqrt{\gamma})T\right) \cdot (-2) = -o(T),$$

and the cumulative utility for the optimizer for the remaining  $\frac{1}{2}T$  rounds is at least

$$(1 - 2\gamma)(\frac{1}{2} - \frac{\sqrt{\gamma}}{2} - 2\gamma)T \cdot 2 + \left(\frac{1}{2}T - (1 - 2\gamma)(\frac{1}{2} - \frac{\sqrt{\gamma}}{2} - 2\gamma)T\right) \cdot (-2) = T - o(T).$$

Thus, the optimizer can obtain a total utility  $T - o(T)$ , which is greater than  $VT = 0$  for the Stackelberg value  $V = 0$  in this game.  $\square$

## 4.2 The geometry of mean-based learning

We have just seen that it is possible for the optimizer to get more than the Stackelberg value when playing against a mean-based learner. This raises an obvious next question: how much utility can an optimizer obtain when playing against a mean-based learner? What is the largest  $\alpha$  such that an optimizer can always obtain utility  $\alpha T - o(T)$  against a mean-based learner?

In this section, we will see how to reduce the problem of constructing the optimal gameplay of a non-adaptive optimizer to solving a control problem in  $N$  dimensions. The primary insight is that a mean-based learner's behavior depends only on their historical cumulative utilities for each of their  $N$  actions, and therefore we can characterize the essential "state" of the learner by a tuple of  $N$  real numbers that represent the cumulative utilities for different actions. The optimizer can control the state of the learner by playing different actions, and in different regions of the state space the learner plays specific responses.

More formally, our control problem will involve constructing a path in  $\mathbb{R}^N$  starting at the origin. For each  $i \in [N]$ , let  $S_i$  equals the subset of  $(u_1, u_2, \dots, u_N) \in \mathbb{R}^N$  where  $u_i = \max(u_1, u_2, \dots, u_N)$  (this will represent the subset of state space where the learner will play action  $b_i$ ). Note that these sets  $S_i$  (up to some intersection of measure 0) partition the entire space  $\mathbb{R}^N$ .

We represent the optimizer's strategy  $\pi$  as a sequence of tuples  $(\alpha_1, t_1), (\alpha_2, t_2), \dots, (\alpha_k, t_k)$  with  $\alpha_i \in \Delta(\mathcal{A})$  and  $t_i \in [0, 1]$  satisfying  $\sum_i t_i = 1$ . Here the tuple  $(\alpha_i, t_i)$  represents the optimizer playing mixed strategy  $\alpha_i$  for a  $t_i$  fraction of the total rounds. This strategy evolves the learner's state as follows. The learner originally starts at the state  $P_0 = 0$ . After the  $i$ th tuple  $(\alpha_i, t_i)$ , the learner's state evolves according to  $P_i = P_{i-1} + t_i(u_L(\alpha_i, b_1), u_L(\alpha_i, b_2), \dots, u_L(\alpha_i, b_N))$  (in fact, the state linearly interpolates between  $P_{i-1}$  and  $P_i$  as the optimizer plays this action). For simplicity, we will assume that positive combinations of vectors of the form  $(u_L(\alpha_i, b_1), u_L(\alpha_i, b_2), \dots, u_L(\alpha_i, b_N))$  can generate the entire state space  $\mathbb{R}^N$ .

To characterize the optimizer's reward, we must know which set  $S_i$  the learner's state belongs to. For this reason, we will insist that for each  $1 \leq i \leq k$ , there exists a  $j_i$  such that both  $P_{i-1}$  and  $P_i$  belong to the same region  $S_{j_i}$ . It is possible to convert any strategy  $\pi$  into a strategy of this form by subdividing a step  $(\alpha, t)$  that crosses a region boundary into two steps  $(\alpha, t')$  and  $(\alpha, t'')$  with  $t = t' + t''$  so that the first step stops exactly at the region boundary. If there is more than one possible choice for  $j_i$  (i.e.  $P_{i-1}$  and  $P_i$  lie on the same region boundary), then without loss of generality we let the optimizer choose  $j_i$ , since the optimizer can always modify the initial path slightly so that  $P_i$  and  $P_{i-1}$  both lie in a unique region.

Once we have done this, the optimizer's average utility per round is given by the expression:

$$U(\pi) = \sum_{i=1}^k t_i u_A(\alpha_i, b_{j_i}).$$



290 **Theorem 9.** Let  $U^* = \sup_{\pi} U(\pi)$  where the supremum is over all valid strategies  $\pi$  in this control  
 291 game. Then

- 292 1. For any  $\varepsilon > 0$ , there exists a non-adaptive strategy for the optimizer which guarantees  
 293 expected utility at least  $(U^* - \varepsilon)T - o(T)$  when playing against any mean-based learner.
- 294 2. For any  $\varepsilon > 0$ , there exists no non-adaptive strategy for the optimizer which can guarantee  
 295 expected utility at least  $(U^* + \varepsilon)T + o(T)$  when playing against any mean-based learner.

296 *Proof.* See Appendix. □

297 Understanding how to solve this control problem (even inefficiently, in finite time) is an interesting  
 298 open problem. In the remainder of this section, we make some general observations which will let us  
 299 cut down the strategy space of the optimizer even further and propose a conjecture to the form of the  
 300 optimal strategy.

301 The first observation is that when the learner has  $N$  actions, our state space is truly  $N - 1$  dimensional,  
 302 not  $N$  dimensional. This is because in addition to the learner's actions only depending on the  
 303 cumulative reward for each action, they in fact only depend on the differences between cumulative  
 304 rewards for different actions (see Definition 2). This means we can represent the state of the learner  
 305 as a vector  $(x_1, x_2, \dots, x_{N-1}) \in \mathbb{R}^{N-1}$ , where  $x_i = u_i - u_N$ . The sets  $S_i$  can be written in  
 306 terms of the  $x_i$  as  $S_i = \{x | x_i = \max(x_1, \dots, x_{N-1}, 0)\}$  for  $1 \leq i \leq N - 1$  and  $S_N = \{x | 0 =$   
 307  $\max(x_1, \dots, x_{N-1}, 0)\}$ .

308 The next observation is that if the optimizer makes several consecutive steps in the same region  $S_i$ ,  
 309 we can combine them into a single step. Specifically, assume  $P_i, P_{i+1}$ , and  $P_{i+2}$  all belong to some  
 310 region  $S_j$ , where  $(\alpha_i, t_i)$  sends  $P_i$  to  $P_{i+1}$  and  $(\alpha_{i+1}, t_{i+1})$  sends  $P_{i+1}$  to  $P_{i+2}$ . Then replacing these  
 311 two steps with  $\left(\frac{\alpha_i t_i + \alpha_{i+1} t_{i+1}}{t_i + t_{i+1}}, t_i + t_{i+1}\right)$  results in a strategy with the exact same reward  $U(\pi)$ .  
 312 Applying this fact whenever possible, this means we can restrict our attention to strategies where all  
 313  $P_i$  (with the possible exception of the final state  $P_k$ ) lie on the boundary of two or more regions  $S_i$ .

314 Finally, we observe that this control problem is scale-invariant; if  $\pi =$   
 315  $((\alpha_1, t_1), (\alpha_2, t_2), \dots, (\alpha_n, t_n))$  is a valid policy that obtains utility  $U$ , then  $\lambda\pi =$   
 316  $((\alpha_1, \lambda t_1), (\alpha_2, \lambda t_2), \dots, (\alpha_n, \lambda t_n))$  is another valid policy (with the exception that  $\sum t_i = \lambda$ , not  
 317 1) which obtains utility  $\lambda U$  (this is true since all the regions  $S_i$  are cones with apex at the origin).  
 318 This means we do not have to restrict to policies with  $\sum t_i = 1$ ; we can choose a policy of any total  
 319 time, as long as we normalize the utility by  $\sum t_i$ .

320 This generalizes the strategy space, but is useful for the following reason. Consider a sequence of  
 321 steps  $\pi$  which starts at some point  $P$  (not necessarily 0) and ends at  $P$ . Then if  $U$  is the average  
 322 utility of this cycle, then  $U^* \geq U$  (in particular, we can consider any policy which goes from 0 to  $P$   
 323 and then repeats this cycle many times). Likewise, if we have a sequence of steps  $\pi$  which starts at  
 324 some point  $P$  and ends at  $\lambda P$  for some  $\lambda > 1$  which achieves average utility  $U$ , then again  $U^* \geq U$   
 325 (by considering the policy which proceeds  $0 \rightarrow P \rightarrow \lambda P \rightarrow \lambda^2 P \rightarrow \dots$  (note that it is essential  
 326 that  $\lambda \geq 1$  to prevent this from converging back to 0 in finite time)).

327 These observations motivate the following conjecture.

328 **Conjecture 10.** The value  $U^*$  is achieved by either:

- 329 1. The average utility of a policy starting at the origin and consisting of at most  $N$  steps (in  
 330 distinct regions).
- 331 2. The average utility of a path of at most  $N$  steps (in distinct regions) which starts at some  
 332 point  $P$  and returns to  $\lambda P$  for some  $\lambda \geq 1$ .

333 We leave it as an interesting open problem to compute the optimal solution to this control problem.



## References

- Shipra Agrawal, Constantinos Daskalakis, Vahab S. Mirrokni, and Balasubramanian Sivan. Robust repeated auctions under heterogeneous buyer behavior. In *Proceedings of the 2018 ACM Conference on Economics and Computation, Ithaca, NY, USA, June 18-22, 2018*, page 171, 2018.
- Robert J. Aumann. Subjectivity and correlation in randomized strategies. *Journal of Mathematical Economics*, 1(1):67 – 96, 1974. ISSN 0304-4068.
- Avrim Blum and Yishay Mansour. From external to internal regret. In Peter Auer and Ron Meir, editors, *Learning Theory*, 2005.
- Mark Braverman, Jieming Mao, Jon Schneider, and Matt Weinberg. Selling to a no-regret buyer. In *Proceedings of the 2018 ACM Conference on Economics and Computation*, pages 523–538. ACM, 2018.
- Nicolò Cesa-Bianchi and Gábor Lugosi. Potential-based algorithms in on-line prediction and game theory. *Machine Learning*, 51(3):239–261, Jun 2003.
- Nicolò Cesa-Bianchi, Yoav Freund, David Haussler, David P. Helmbold, Robert E. Schapire, and Manfred K. Warmuth. How to use expert advice. *J. ACM*, 44(3):427–485, May 1997. ISSN 0004-5411.
- Julius Farkas. Theorie der einfachen ungleichungen. *Journal für die reine und angewandte Mathematik*, 124:1–27, 1902.
- Dean P. Foster and Rakesh V. Vohra. A randomization rule for selecting forecasts. *Operations Research*, 41(4):704–709, 1993.
- Dean P. Foster and Rakesh V. Vohra. Calibrated learning and correlated equilibrium. *Games and Economic Behavior*, 21(1):40 – 55, 1997.
- Dean P. Foster and Rakesh V. Vohra. Asymptotic calibration. *Biometrika*, 85(2):379–390, 06 1998.
- Dean P. Foster and Rakesh V. Vohra. Regret in the on-line decision problem. *Games and Economic Behavior*, 29(1):7 – 35, 1999.
- Yoav Freund and Robert E. Schapire. A decision-theoretic generalization of on-line learning and an application to boosting. *Journal of Computer and System Sciences*, 55(1):119 – 139, 1997.
- Yoav Freund and Robert E. Schapire. Adaptive game playing using multiplicative weights. *Games and Economic Behavior*, 29(1):79 – 103, 1999.
- James Hannan. Approximation to bayes risk in repeated plays. *Contributions to the Theory of Games*, 3:97–139, 1957.
- Sergiu Hart and Andreu Mas-Colell. A simple adaptive procedure leading to correlated equilibrium. *Econometrica*, 68(5):1127–1150, 2000.
- N. Littlestone and M.K. Warmuth. The weighted majority algorithm. *Information and Computation*, 108(2):212 – 261, 1994.
- John von Neumann. Zur theorie der gesellschaftsspiele. *Mathematische annalen*, 100(1):295–320, 1928.
- Heinrich Von Stackelberg. *Market structure and equilibrium*. Springer Science & Business Media, 2010.

## Appendix

### Proof of Theorem 9

*Proof of Theorem 9. Part 1:* Let  $\pi = ((\alpha_1, t_1), (\alpha_2, t_2), \dots, (\alpha_k, t_k))$  be a strategy for the control problem which satisfies  $U(\pi) \geq U^* - 0.5\varepsilon$ . As suggested by  $\pi$ , we will consider the strategy of the optimizer where for each  $i$  (in order), the optimizer plays mixed strategy  $\alpha_i$  for  $t_i T$  rounds. We will show that this strategy guarantees an expected utility of  $(U^* - \varepsilon)T - o(T)$  for the optimizer.

Since the learner is mean-based, they are playing a  $\gamma$ -mean-based algorithm for some  $\gamma = o(1)$ . As in Definition 2, let  $\sigma_{j,t}$  be the learner's cumulative utility from playing action  $b_j$  for rounds 1 through  $t$ . For  $0 \leq i \leq k$ , let  $\tau_i = \sum_{j=1}^i t_j$  (with  $T_0 = 0$ ). For  $\tau \in [0, 1]$ , let  $P(\tau)$  be the state of the control problem at time  $\tau$  (linearly interpolating between  $P_i$  and  $P_{i+1}$  if  $\tau_i \leq \tau \leq \tau_{i+1}$ ); note that  $P(\tau_i) = P_i$ . We will first show that with high probability,  $|\sigma_{j,\tau T} - TP(\tau)_j| \leq o(T)$ ; in other words,  $P(\tau)$  provides a good approximation of the true cumulative utilities of the learner in the repeated game.

To see this, we first claim  $|\mathbb{E}[\sigma_{j,\tau T}] - TP(\tau)_j| \leq k$ . Fix any round  $t$  in  $[\tau_i T, \tau_{i+1} T]$ ; this means that the optimizer plays strategy  $\alpha_i$  during round  $t$ , and therefore that  $\mathbb{E}[\sigma_{j,t+1} - \sigma_{j,t}] = u_L(\alpha, b_j)$ . If  $t+1$  also belongs to  $[\tau_i T, \tau_{i+1} T]$  (so  $t/T$  and  $(t+1)/T$  both belong to  $[\tau_i, \tau_{i+1}]$ ), we also have that  $T(P(\frac{t+1}{T})_j - P(\frac{t}{T})_j) = u_L(\alpha, b_j)$ . Since there are only  $k$  intervals,  $t$  and  $t+1$  belong to the same interval for all but  $k$  rounds, and since utilities are bounded by 1 it follows that  $|\mathbb{E}[\sigma_{j,\tau T}] - TP(\tau)_j| \leq k$ . Now, we also claim that with high probability (at least  $1 - 1/T$ ), for all  $t$ ,  $|\mathbb{E}[\sigma_{j,t}] - \sigma_{j,t}| \leq 10\sqrt{T \log(TN)}$ . This follows simply from Hoeffding's inequality, since each component of  $\sigma_{j,t}$  is the sum of  $t$  independent random variables bounded in  $[-1, 1]$ . Together, this implies that  $|\mathbb{E}[\sigma_{j,\tau T}] - TP(\tau)_j| \leq o(T)$ .

We now claim that for sufficiently large  $T$ , the learner will play action  $j_i$  for rounds  $t \in [\tau_i T, \tau_{i+1} T]$ . To see this, recall that  $S_{j_i}$  is the unique region containing both  $P_i$  and  $P_{i+1}$ . Since regions are convex with disjoint interiors, this means that the segment connecting  $P_i$  and  $P_{i+1}$  lies in the interior of  $S_{j_i}$ . By the definition of  $S_{j_i}$ , this implies that there exists some  $\delta > 0$  such that for at least  $1 - 0.5\varepsilon$  fraction of  $\tau$  in the interval  $[\tau_i, \tau_{i+1}]$ ,  $P(\tau)$  satisfies  $P(\tau)_{j_i} - P(\tau)_j \geq \delta$  for all  $j \neq j_i$ . Since  $|\mathbb{E}[\sigma_{j,\tau T}] - TP(\tau)_j| \leq o(T)$  for all  $j$ , this means that for at least a  $1 - 0.5\varepsilon$  fraction of rounds  $t$  in  $[\tau_i T, \tau_{i+1} T]$ , we have that  $\sigma_{j_i,\tau T} - \sigma_{j,\tau T} \geq \delta T - o(T)$ . For sufficiently large  $T$ , this is bigger than  $\gamma T$  (which is also  $o(T)$ ).

Therefore, for each  $i$ , for at least  $(1 - 0.5\varepsilon)\varepsilon t_i T$  rounds, the optimizer plays the mixed strategy  $\alpha$  and the learner plays action  $b_{j_i}$ . The optimizer's total expected utility is therefore at least

$$\sum_{i=1}^k (1 - 0.5\varepsilon) t_i T u_A(\alpha_i, b_{j_i}) = (1 - 0.5\varepsilon) U(\pi) T \geq (1 - \varepsilon) U^* T.$$

### Part 2:

Assume there exists such a family (one for each  $T$ ) of non-adaptive strategies  $(\alpha^1, \alpha^2, \dots, \alpha^T)$  for the optimizer. Since this strategy must work against any mean-based learner, we will construct a bad mean-based learner for this strategy in the following way. Fix  $\gamma = T^{-1/2}$  (any  $\gamma > 2/T$  will work). At any time  $t$ , let  $J_t = \{b_j \mid \max_i \sigma_{i,t} - \sigma_{j,t} < \gamma T\}$  be the set of actions for the learner whose historical performance are within  $\gamma T$  of the optimally performing action. The mean-based property requires the learner to play an action in  $J_t$  with probability at least  $1 - K\gamma$ . Our mean-based learner will choose the *worst* action in  $J_t$  for the optimizer; that is, the action  $b_j \in J_t$  which minimizes  $u_A(\alpha^t, b_j)$ .

Now, choose a sufficiently large  $T_0$  such that this strategy achieves utility at least  $(U^* + 0.5\varepsilon)$  for the optimizer against this mean-based learner. We now claim we can construct a solution  $\pi$  to the control problem with  $k = T_0$  which satisfies  $U(\pi) \geq U^* + 0.5\varepsilon$ , contradicting the optimality of  $U^*$ . Consider the protocol  $\pi = ((\alpha^1, 1/T_0), (\alpha^2, 1/T_0), \dots, (\alpha_{T_0}^T, 1/T_0))$ . This is not a proper protocol, since some of the steps of this protocol might start in one region  $S_j$  and end in a different region  $S_{j'}$ , but for any such steps we can divide them into substeps per region as described earlier.

420 We now claim that the step  $(\alpha^t, 1/T_0)$  only passes through regions in the set  $J_t$ . To see this, note  
 421 that  $P_t$  and  $P_{t+1}$  differ in each coordinate by at most  $1/T_0$  (since all utilities are bounded by 1).  
 422 Therefore if the segment between  $P_t$  and  $P_{t+1}$  passes through a point on the boundary  $S_j \cap S_{j'}$   
 423 (where  $u_j = u'_j = \max_i u_i$ ), it must be the case that  $(P_t)_j$  and  $(P_t)_{j'}$  are both within  $2/T_0$  of  
 424  $\max_j(P_t)_j$ . By construction  $(P_t)_j = \frac{1}{T_0} \sigma_{j,t}$ , so this implies that  $\max_i \sigma_{i,t} - \sigma_{j,t} \leq 2 \leq \gamma T$ , and  
 425 therefore  $j \in J_t$  (similarly,  $j' \in J_t$ ).  
 426 Now, if the step  $(\alpha^t, 1/T_0)$  only passes through regions in the set  $J_t$ , it obtains utility for the optimizer  
 427 at least  $\min_{b_j \in J_t} \frac{1}{T_0} u_A(\alpha^t, b_j)$ , and thus

$$U(\pi) = \frac{1}{T_0} \sum_t \min_{b_j \in J_t} u_A(\alpha^t, b_j).$$

428 But this sum is exactly the utility of the optimizer against our mean-based learner, which is at least  
 429  $(U^* + 0.5\varepsilon)T_0$ . It follows that  $U(\pi) \geq U^* + 0.5\varepsilon$ , contradicting that  $U^*$  is optimal.

430

□
